# Supplementary material for: SCANVIS: a tool for SCoring, ANnotating and VISualizing splice junctions
Source: Oxford University Press journal article supplement (doi:10.1093/bioinformatics/btz452), 2019-06-06
Supplement: bioinformatics_35_22_4843_s2.docx [file bioinformatics_35_22_4843_s2.docx]

**Supplementary materials for SCANVIS**

**Figure S1**: Barplot showing the number of samples for each tissue/cancer type in the TCGA (black outline bars) and GTEx cohorts used for this study with the largest group (BRCA/TCGA) having 1220 samples and the smallest group (HNSC/TCGA) having 24 samples.

**Figure S2**: RRS variances in decreasing order (left) of the first 100K SJs (from millions) with the 5000th SJ (red dots) located close to the exponential curve elbow. Boxplots show SVM AUC scores from models built with the top 5000 variable SJs where tissue/cancer types were predicted over 20 iterations of 10-fold cross-validations for TCGA (middle) and GTEX (right)

**Figure S3**: PCA (left) and t-SNE (right) plots for GTEx (top) and TCGA (bottom) samples using SCANVIS RRS scores on the top 5000 most variable splice junctions for each cohort

**Figure S4**: PCA (left) and t-SNE (right) plots computed using the 1528 junctions in the intersection of the top 5000 variable junctions from each cohort. Point types differentiate TCGA and GTEx samples to highlight any obvious cohort separation. Top figures show all GTEx and TCGA samples and no clear cohort separation. The bottom figures show thyroid and skin tissue samples, with thyroid samples clustering together across cohorts and TCGA melanomas separating from normal GTEx skin samples.

**Figure S5**: IGV snapshots of the gene PLEKHA6 as annotated by gencode 24 and 26 with reference to the human reference genome GRCh38. The three Novel Exons detected by SCANVIS with reference to hg19 (manuscript Figure 1) are actually annotated exons in the more recent human annotations where novel exons were detected by SCANVIS in reference hg19. This is a good proof of principle that the SCANVIS Novel Exon detection system functions well.
